# Supplementary material for: Enrichment of intestinal Lactobacillus by enhanced secretory IgA coating alters glucose homeostasis in P2rx7−/− mice
Source: PubMed Central journal article supplement (PMC6597561; doi:10.1038/s41598-019-45724-9), 2019-06-27
Supplement: 41598_2019_45724_MOESM1_ESM.pdf [file 41598_2019_45724_MOESM1_ESM.pdf]

# Enrichment of intestinal *Lactobacillus* by enhanced secretory IgA coating alters glucose homeostasis in *P2rx7<sup>-/-</sup>* mice

Lisa Perruzza, Francesco Strati, Giorgio Gargari, Anna Maria D'Erchia, Bruno Fosso, Graziano Pesole, Simone Guglielmetti, Fabio Grassi

## Supplementary information

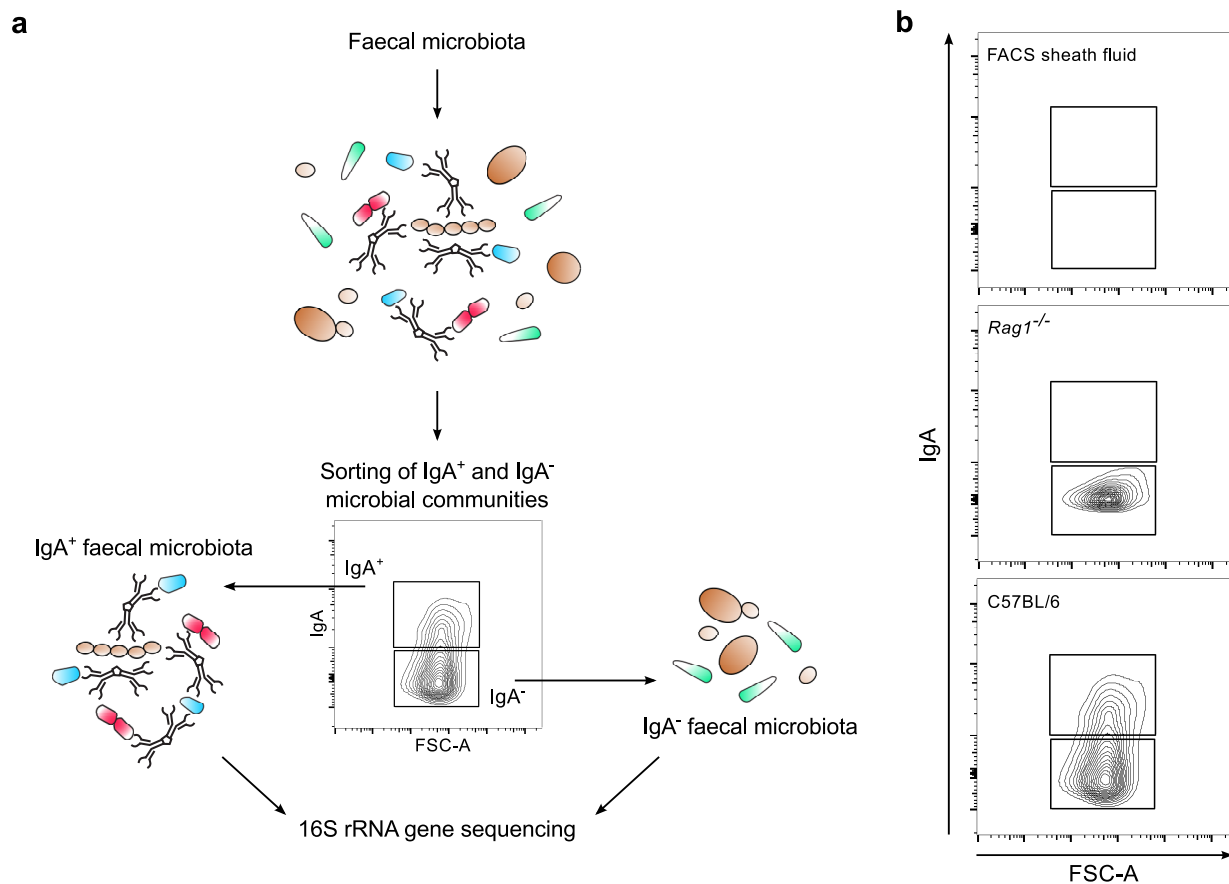

**Supplementary Figure S1. IgA-SEQ analysis.** **a)** Workflow for the characterization of the IgA<sup>+</sup> and IgA<sup>-</sup> fractions of the faecal microbiota. From faecal samples, IgA-coated (IgA<sup>+</sup>) bacteria were separated from non-coated (IgA<sup>-</sup>) bacteria by flow cytometry and subsequently characterized by 16S rRNA gene sequencing. **b)** Representative contour plots for IgA coating and forward scatter (FSC-A) of faecal bacteria isolated from the indicated mice and FACS sheath fluid used as negative control.

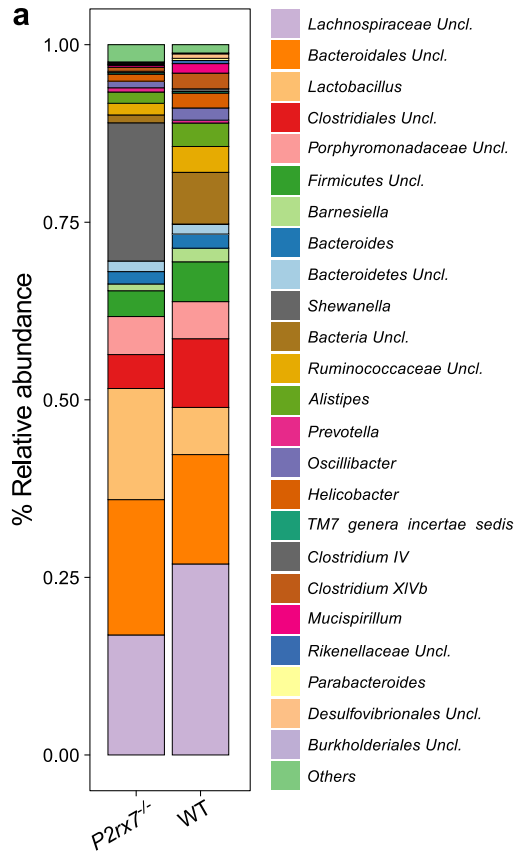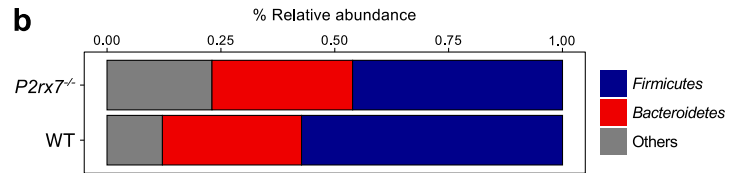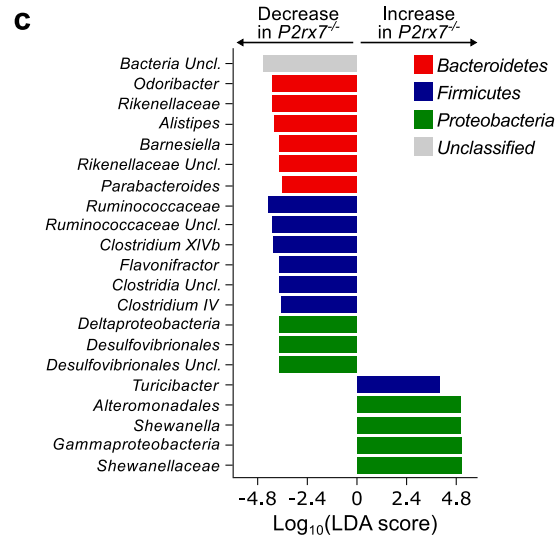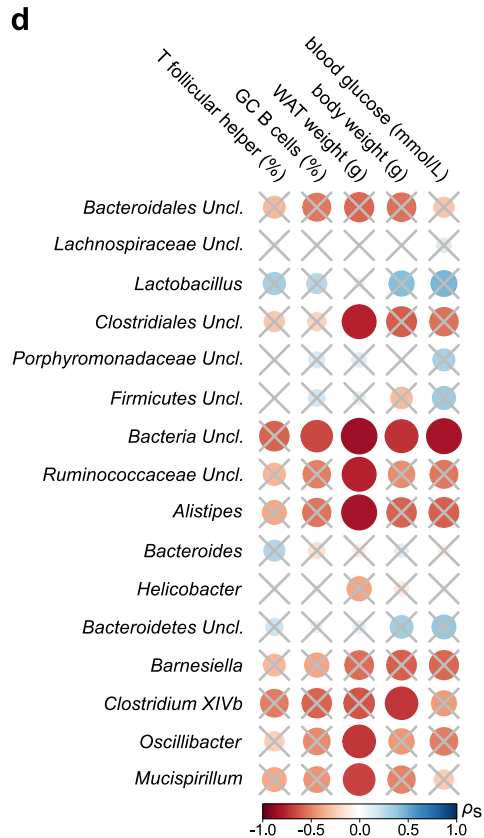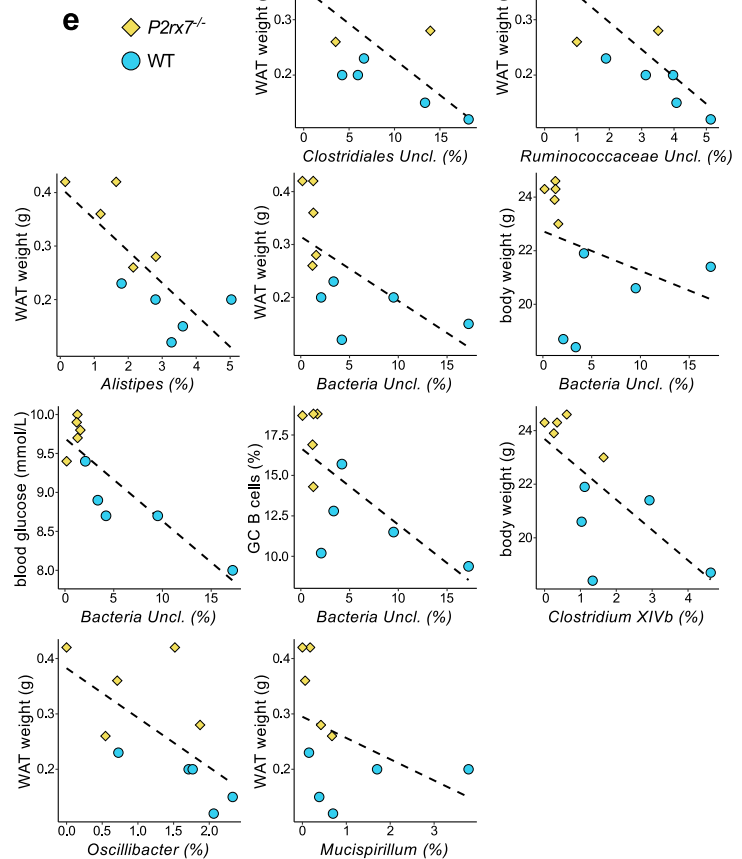

**Supplementary Figure S2: Characterization of the faecal microbiota from WT and *P2rx7*<sup>-/-</sup> mice.** **a)** Mean relative abundance, at genus level, of the presorted faecal microbiota of *P2rx7*<sup>-/-</sup> and WT mice. All bacterial genera with relative abundance <0.1% are reported together and labelled as “others”. **b)** Mean relative abundance (%) of *Firmicutes* and *Bacteroidetes* in the presorted faecal microbiota of *P2rx7*<sup>-/-</sup> and WT mice. The total abundance of all other phyla is reported as “others”. **c)** Log<sub>10</sub> of LDA scores for the most discriminant bacterial taxa identified by LEfSe in the presorted faecal microbiota of *P2rx7*<sup>-/-</sup> and WT mice. Positive and negative LDA scores indicate the taxa enriched or depleted in *P2rx7*<sup>-/-</sup> mice. Only taxa having a *p*<0.05 (Wilcoxon rank-sum test) and LDA>|2.0| are shown. **d)** Spearman's  $\rho$  ( $\rho_s$ ) correlation between the relative abundance of the most abundant bacterial genera (>0.5% and detectable in at least 70% of the samples) in the presorted faecal microbiota of *P2rx7*<sup>-/-</sup> and WT mice with metabolic and immunological parameters. **e)** Correlation plots of the significant Spearman's correlations between bacterial taxa and metabolic and immunological parameters of *P2rx7*<sup>-/-</sup> and WT mice. *P2rx7*<sup>-/-</sup> and WT mice are coloured in yellow and blue and shaped as diamonds and circles, respectively. Dashed lines indicate the regression curves.

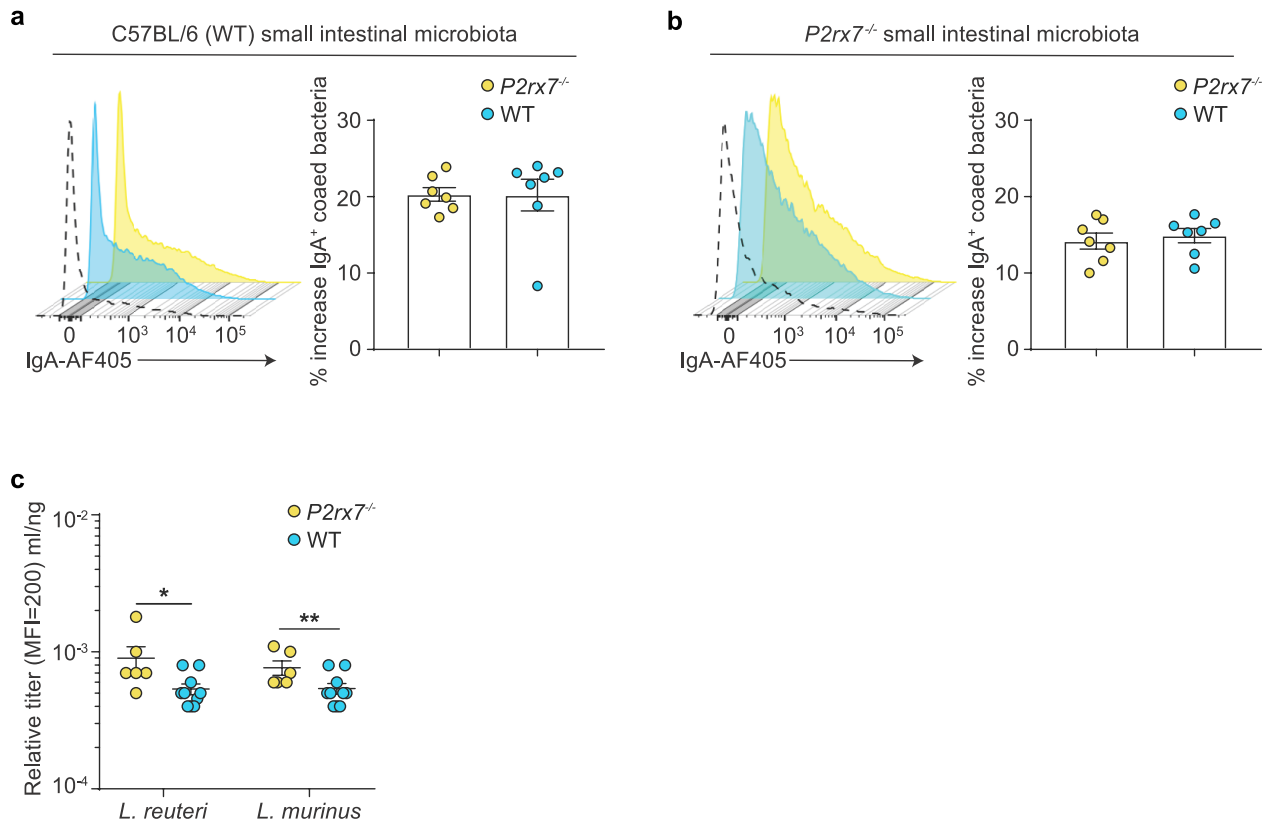

**Supplementary Figure S3: Selective targeting of *Lactobacillus* by SIgA in *P2rx7<sup>-/-</sup>* mice.** Flow cytometry profiles with AF405-labelled anti-mouse IgA and statistics of relative increase in IgA coating of small intestine microbiota from **a**) WT or **b**) *P2rx7<sup>-/-</sup>* mice by faecal IgA from WT (light blue graph) or *P2rx7<sup>-/-</sup>* (yellow graph) mice. **c**) Faecal anti-*L. reuteri* and anti-*L. murinus* IgA titers in WT and *P2rx7<sup>-/-</sup>* mice.

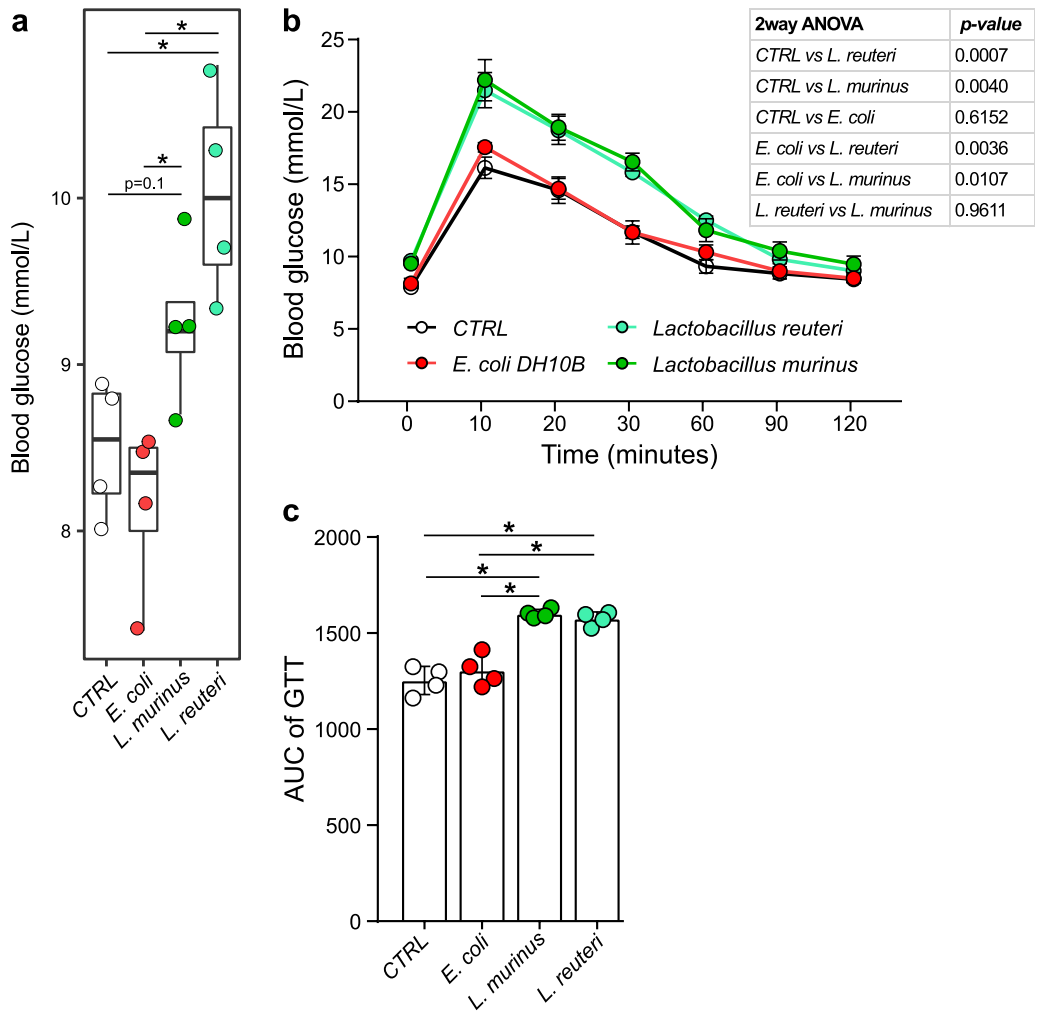

**Supplementary Figure S4: Altered glucose homeostasis in *Lactobacillus* treated *Igh-J<sup>-/-</sup>* animals. a) Glycaemia after 21 days of treatment. b) Glucose tolerance test. c) Areas under the curve (AUC) of GTT. \* $p < 0.05$ , Wilcoxon rank-sum test;  $n = 4$  per group.**

**Supplementary Table S1:** Sample metadata, unrarefied OTU table and taxonomic classification.
